# Supplementary material for: Comparative Proteomics of Peritrophic Matrix Provides an Insight into its Role in Cry1Ac Resistance of Cotton Bollworm Helicoverpa armigera
Source: PubMed Central journal article supplement (PMC6409725; doi:10.3390/toxins11020092), 2019-02-02
Supplement: toxins-11-00092-s001.pdf [file toxins-11-00092-s001.pdf]

# Supplementary Materials: Comparative Proteomics of Peritrophic Matrix Provides an Insight into its Role in Cry1Ac Resistance of Cotton Bollworm *Helicoverpa armigera*

Minghui Jin, Chongyu Liao, Swapan Chakrabarty, Kongming Wu and Yutao Xiao

**Table S1.** KEGG pathways of P-value < 0.05 in XJ10 compared with XJ.

| KEGG pathway                                 | Pathway ID | Gene number | P-value     |
|----------------------------------------------|------------|-------------|-------------|
| Ribosome biogenesis in eukaryotes            | ko03008    | 28          | 2.47E-11    |
| Metabolism of xenobiotics by cytochrome P450 | ko00980    | 27          | 2.90E-07    |
| Drug metabolism - cytochrome P450            | ko00982    | 25          | 3.31E-07    |
| Porphyrin and chlorophyll metabolism         | ko00860    | 19          | 1.52E-05    |
| Retinol metabolism                           | ko00830    | 15          | 0.000260309 |
| Ascorbate and aldarate metabolism            | ko00053    | 15          | 0.00041008  |
| Pentose and glucuronate interconversions     | ko00040    | 19          | 0.00054811  |
| Drug metabolism - other enzymes              | ko00983    | 18          | 0.001095362 |
| Starch and sucrose metabolism                | ko00500    | 16          | 0.004122616 |
| Arachidonic acid metabolism                  | ko00590    | 8           | 0.01211841  |
| Nicotinate and nicotinamide metabolism       | ko00760    | 6           | 0.01614292  |
| Protein processing in endoplasmic reticulum  | ko04141    | 22          | 0.02472588  |
| Vitamin B6 metabolism                        | ko00750    | 2           | 0.03268697  |
| Glutathione metabolism                       | ko00480    | 13          | 0.03509358  |
| One carbon pool by folate                    | ko00670    | 4           | 0.04403044  |

Table S2. Proteins were identified and quantified in Peritrophic matrix.

| Description                                                                                                   | Symbol         | Peptides number |
|---------------------------------------------------------------------------------------------------------------|----------------|-----------------|
| PREDICTED: UPF0586 protein C9orf41 homolog [Papilio polytes]                                                  | XM_021325089.1 | 1               |
| PREDICTED: hepatoma-derived growth factor-related protein 2 [Papilio machaon]                                 | XM_021325095.1 | 1               |
| PREDICTED: histone H3.3 isoform X1 [Nothobranchius furzeri]                                                   | XM_021338021.1 | 1               |
| Gag-pol polyprotein [Operophtera brumata]                                                                     | XM_021325299.1 | 1               |
| elongation factor 1-gamma [Papilio xuthus]                                                                    | XM_021325364.1 | 1               |
| PREDICTED: leukocyte surface antigen CD53-like isoform X1 [Papilio machaon]                                   | XM_021325436.1 | 2               |
| PREDICTED: neural cell adhesion molecule 2-like isoform X1 [Bombyx mori]                                      | XM_021325537.1 | 1               |
| cGMP-dependent protein kinase, isozyme 1 [Papilio xuthus]                                                     | XM_021325660.1 | 1               |
| insect intestinal mucin 2, partial [Helicoverpa armigera]                                                     | XM_021326099.1 | 10              |
| ionotropic receptor [Ostrinia furnacalis]                                                                     | XM_021326308.1 | 2               |
| PREDICTED: transcription factor TFIIIB component B" homolog [Papilio xuthus]                                  | XM_021326460.1 | 1               |
| lipase [Helicoverpa armigera]                                                                                 | XM_021326676.1 | 4               |
| PREDICTED: sodium-coupled monocarboxylate transporter 1 [Bombyx mori]                                         | XM_021327183.1 | 1               |
| serine protease inhibitor 5 [Helicoverpa armigera]                                                            | XM_021327264.1 | 1               |
| Karyopherin beta 3 [Pararge aegeria]                                                                          | XM_021327300.1 | 1               |
| prophenol oxidase activating enzyme 3 [Spodoptera litura]                                                     | XM_021327314.1 | 1               |
| PREDICTED: guanine nucleotide-binding protein G(o) subunit alpha isoform X2 [Papilio xuthus]                  | XM_021327420.1 | 1               |
| wunen, partial [Pararge aegeria]                                                                              | XM_021327456.1 | 1               |
| CLUMA_CG005324, isoform A [Clunio marinus]                                                                    | XM_021327707.1 | 4               |
| rRNA 2'-O-methyltransferase fibrillar [Papilio machaon]                                                       | XM_021327734.1 | 1               |
| PREDICTED: coiled-coil domain-containing protein 97 [Amyelois transitella]                                    | XM_021327892.1 | 1               |
| PREDICTED: synaptic vesicle glycoprotein 2A-like [Bombyx mori]                                                | XM_021327898.1 | 1               |
| PREDICTED: E3 ubiquitin-protein ligase HECTD1 [Amyelois transitella]                                          | XM_021328040.1 | 2               |
| 60S acidic ribosomal protein P2 [Spodoptera frugiperda]                                                       | XM_021328059.1 | 1               |
| PREDICTED: LOW QUALITY PROTEIN: carboxypeptidase B-like [Bombyx mori]                                         | XM_021328067.1 | 4               |
| PREDICTED: vacuolar ATPase assembly integral membrane protein VMA21 homolog [Amyelois transitella]            | XM_021328173.1 | 1               |
| diacylglycerol O-acyl transferase [Manduca sexta]                                                             | XM_021328350.1 | 1               |
| PREDICTED: unconventional myosin-XV isoform X2 [Bombyx mori]                                                  | XM_021328621.1 | 1               |
| PREDICTED: cytochrome b5-like isoform X2 [Papilio polytes]                                                    | XM_021328653.1 | 1               |
| Symplekin [Papilio xuthus]                                                                                    | XM_021328674.1 | 1               |
| methionine-rich storage protein [Spodoptera litura]                                                           | XM_021328869.1 | 8               |
| PREDICTED: probable transaldolase [Amyelois transitella]                                                      | XM_021328990.1 | 1               |
| PREDICTED: monosaccharide-sensing protein 1-like isoform X1 [Papilio xuthus]                                  | XM_021329072.1 | 1               |
| PREDICTED: dynein heavy chain 8, axonemal [Amyelois transitella]                                              | XM_021329100.1 | 1               |
| ribosomal protein S27A [Spodoptera frugiperda]                                                                | XM_021329136.1 | 2               |
| sarco/endoplasmic reticulum calcium ATPase [Bombyx mori]                                                      | XM_021329296.1 | 1               |
| PREDICTED: E3 ubiquitin-protein ligase Bre1 [Bombyx mori]                                                     | XM_021329346.1 | 1               |
| PREDICTED: tubulin alpha-1 chain-like [Amyelois transitella]                                                  | XM_021338879.1 | 1               |
| 63 kDa sperm flagellar membrane protein [Papilio xuthus]                                                      | XM_021329558.1 | 1               |
| diazepam-binding inhibitor [Helicoverpa armigera]                                                             | XM_021329625.1 | 1               |
| lysozyme precursor [Helicoverpa zea]                                                                          | XM_021330615.1 | 1               |
| carboxypeptidase precursor [Helicoverpa armigera]                                                             | XM_021330765.1 | 1               |
| carboxypeptidase B precursor [Helicoverpa zea]                                                                | XM_021330831.1 | 2               |
| carboxypeptidase A [Helicoverpa armigera]                                                                     | XM_021330834.1 | 2               |
| carboxypeptidase [Helicoverpa armigera]                                                                       | XM_021330844.1 | 1               |
| carboxypeptidase [Helicoverpa armigera]                                                                       | XM_021330848.1 | 3               |
| serine protease 24 [Mamestra configurata]                                                                     | XM_021330937.1 | 2               |
| Mini-chromosome maintenance complex-binding protein [Papilio xuthus]                                          | XM_021331050.1 | 1               |
| isochorismatase domain containing protein [Bombyx mori]                                                       | XM_021331129.1 | 1               |
| ribosomal protein L23 [Bombyx mori]                                                                           | XM_021331155.1 | 2               |
| neutral lipase [Helicoverpa armigera]                                                                         | XM_021331172.1 | 2               |
| neutral lipase [Helicoverpa armigera]                                                                         | XM_021331174.1 | 2               |
| neutral lipase [Helicoverpa armigera]                                                                         | XM_021331175.1 | 2               |
| PREDICTED: proton-coupled amino acid transporter 4 isoform X1 [Plutella xylostella]                           | XM_021331270.1 | 1               |
| C5197 [Bicyclus anynana]                                                                                      | XM_021331278.1 | 1               |
| PREDICTED: twitchin [Amyelois transitella]                                                                    | XM_021331369.1 | 2               |
| PREDICTED: Krueppel homolog 2 [Amyelois transitella]                                                          | XM_021331414.1 | 1               |
| Extracellular domains-containing protein CG31004 [Papilio machaon]                                            | XM_021331713.1 | 1               |
| PREDICTED: calnexin [Bombyx mori]                                                                             | XM_021332065.1 | 1               |
| PREDICTED: CTL-like protein 2 isoform X3 [Papilio machaon]                                                    | XM_021332162.1 | 1               |
| PREDICTED: macrophage migration inhibitory factor-like [Amyelois transitella]                                 | XM_021332506.1 | 1               |
| PREDICTED: sodium/potassium/calcium exchanger 3-like [Papilio xuthus]                                         | XM_021332356.1 | 1               |
| PREDICTED: surfeit locus protein 4 homolog [Papilio polytes]                                                  | XM_021332409.1 | 1               |
| heat shock protein [Helicoverpa armigera]                                                                     | XM_021332476.1 | 5               |
| alpha-amylase [Helicoverpa armigera]                                                                          | XM_021332568.1 | 1               |
| -                                                                                                             | XM_021332684.1 | 1               |
| chitin-binding protein, partial [Helicoverpa armigera]                                                        | XM_021332791.1 | 1               |
| calreticulin precursor [Papilio xuthus]                                                                       | XM_021332929.1 | 2               |
| PREDICTED: V-type proton ATPase 21 kDa proteolipid subunit-like [Plutella xylostella]                         | XM_021332932.1 | 1               |
| PREDICTED: protocadherin-like wing polarity protein stan [Amyelois transitella]                               | XM_021332965.1 | 3               |
| PREDICTED: 27 kDa hemolymph protein-like [Papilio machaon]                                                    | XM_021332985.1 | 2               |
| PREDICTED: dentin sialophosphoprotein isoform X1 [Papilio xuthus]                                             | XM_021333267.1 | 1               |
| PREDICTED: peroxisome biogenesis factor 2 [Amyelois transitella]                                              | XM_021333273.1 | 1               |
| PREDICTED: probable 2-oxoglutarate dehydrogenase E1 component DHKTD1 homolog, mitochondrial [Papilio polytes] | XM_021333391.1 | 1               |
| farnesoic acid O-methyltransferase [Bombyx mori]                                                              | XM_021333409.1 | 2               |
| retinol-binding protein [Anopheles darlingi]                                                                  | XM_021333587.1 | 1               |
| PREDICTED: protein virilizer [Amyelois transitella]                                                           | XM_021333706.1 | 2               |
| fatty acid-binding protein 3 [Helicoverpa armigera]                                                           | XM_021333801.1 | 4               |
| ecdysteroid-regulated protein, partial [Helicoverpa armigera]                                                 | XM_021333802.1 | 2               |

|                                                                                                              |                |    |
|--------------------------------------------------------------------------------------------------------------|----------------|----|
| PREDICTED: angiotensin-converting enzyme-like isoform X1 [Bombyx mori]                                       | XM_021333840.1 | 1  |
| PREDICTED: protein Skeletor, isoforms D/E isoform X1 [Bombyx mori]                                           | XM_021334380.1 | 1  |
| PREDICTED: telomere length regulation protein TEL2 homolog [Papilio machaon]                                 | XM_021334385.1 | 1  |
| protease [Helicoverpa armigera]                                                                              | XM_021334514.1 | 1  |
| PREDICTED: synaptic vesicle glycoprotein 2B-like [Amyelois transitella]                                      | XM_021334555.1 | 1  |
| polycalin [Helicoverpa armigera]                                                                             | XM_021334936.1 | 3  |
| PREDICTED: nuclear RNA export factor 1 [Bombyx mori]                                                         | XM_021334941.1 | 1  |
| PREDICTED: adenylate cyclase type 8 [Papilio xuthus]                                                         | XM_021335116.1 | 1  |
| PREDICTED: protein 4.1 homolog isoform X2 [Amyelois transitella]                                             | XM_021335209.1 | 1  |
| PREDICTED: conserved oligomeric Golgi complex subunit 4 [Amyelois transitella]                               | XM_021335680.1 | 2  |
| PREDICTED: vacuolar protein sorting-associated protein 45 isoform X1 [Amyelois transitella]                  | XM_021335688.1 | 1  |
| PREDICTED: probable malate dehydrogenase, mitochondrial [Papilio machaon]                                    | XM_021335689.1 | 1  |
| chymotrypsin-like protease C9 [Heliothis virescens]                                                          | XM_021335717.1 | 5  |
| protease [Helicoverpa armigera]                                                                              | XM_021335730.1 | 2  |
| PREDICTED: facilitated trehalose transporter Tret1 [Papilio xuthus]                                          | XM_021335746.1 | 2  |
| PREDICTED: solute carrier family 2, facilitated glucose transporter member 6-like [Bombyx mori]              | XM_021335802.1 | 1  |
| seminal fluid protein HACP038 [Heliconius erato]                                                             | XM_021335830.1 | 1  |
| 60S ribosomal protein L15 [Spodoptera frugiperda]                                                            | XM_021335870.1 | 1  |
| modifier of mdg4, partial [Pararge aegeria]                                                                  | XM_021335943.1 | 1  |
| vacuolar ATP synthase subunit E [Bombyx mori]                                                                | XM_021335983.1 | 1  |
| serpin-2 [Spodoptera exigua]                                                                                 | XM_021336300.1 | 1  |
| PREDICTED: fibrillin-1-like [Amyelois transitella]                                                           | XM_021336028.1 | 3  |
| PREDICTED: high affinity copper uptake protein 1-like isoform X1 [Amyelois transitella]                      | XM_021336232.1 | 1  |
| takeout-like protein 3 [Helicoverpa armigera]                                                                | XM_021336405.1 | 1  |
| thioredoxin peroxidase [Helicoverpa armigera]                                                                | XM_021336615.1 | 1  |
| PREDICTED: LOW QUALITY PROTEIN: myosin heavy chain, non-muscle-like [Plutella xylostella]                    | XM_021336899.1 | 2  |
| PREDICTED: calmodulin isoform X1 [Papilio polytes]                                                           | XM_021336917.1 | 1  |
| PREDICTED: elongation factor 1-alpha 2 [Bombyx mori]                                                         | XM_021337025.1 | 3  |
| aminopeptidase N [Helicoverpa armigera]                                                                      | XM_021337080.1 | 5  |
| aminopeptidase N [Helicoverpa armigera]                                                                      | XM_021337081.1 | 4  |
| sodium/solute symporter [Anopheles darlingi]                                                                 | XM_021337272.1 | 1  |
| PREDICTED: basement membrane-specific heparan sulfate proteoglycan core protein isoform X3 [Papilio machaon] | XM_021337347.1 | 12 |
| PREDICTED: ATP synthase subunit alpha, mitochondrial [Papilio polytes]                                       | XM_021337525.1 | 1  |
| actin 5C, isoform B [Drosophila melanogaster]                                                                | XM_021337743.1 | 7  |
| PREDICTED: ornithine aminotransferase, mitochondrial [Bombyx mori]                                           | XM_021337833.1 | 1  |
| PREDICTED: trypsin, alkaline C-like [Papilio machaon]                                                        | XM_021337856.1 | 1  |
| trypsin [Heliothis virescens]                                                                                | XM_021337869.1 | 1  |
| trypsin-like protease [Helicoverpa armigera]                                                                 | XM_021337877.1 | 2  |
| trypsin-like protease [Helicoverpa armigera]                                                                 | XM_021337879.1 | 2  |
| PREDICTED: tyrosine-protein phosphatase 99A [Amyelois transitella]                                           | XM_021337994.1 | 1  |
| cytochrome P450 CYP4M10v2 [Helicoverpa armigera]                                                             | XM_021338398.1 | 1  |
| pancreatic lipase 2 [Mamestra configurata]                                                                   | XM_021338421.1 | 3  |
| lipase [Helicoverpa armigera]                                                                                | XM_021338439.1 | 3  |
| PREDICTED: serine-rich adhesin for platelets-like isoform X1 [Cephus cinctus]                                | XM_021338461.1 | 1  |
| trypsin, partial [Helicoverpa armigera]                                                                      | XM_021338513.1 | 2  |
| diverged serine protease [Helicoverpa armigera]                                                              | XM_021338518.1 | 4  |
| PREDICTED: transmembrane protease serine 9-like [Papilio polytes]                                            | XM_021338520.1 | 3  |
| PREDICTED: synaptosomal-associated protein 25 isoform X1 [Bombyx mori]                                       | XM_021338608.1 | 1  |
| PREDICTED: protein FAM161A [Amyelois transitella]                                                            | XM_021338619.1 | 1  |
| PREDICTED: G-protein coupled receptor Mth2-like [Papilio polytes]                                            | XM_021338627.1 | 1  |
| PREDICTED: U4/U6.U5 tri-snRNP-associated protein 2 [Papilio polytes]                                         | XM_021338702.1 | 1  |
| PREDICTED: myosin heavy chain, muscle isoform X5 [Papilio xuthus]                                            | XM_021338811.1 | 6  |
| PREDICTED: C-5 sterol desaturase erg32-like [Papilio xuthus]                                                 | XM_021338969.1 | 1  |
| PREDICTED: transcription initiation factor TFIID subunit 4 [Bombyx mori]                                     | XM_021339017.1 | 1  |
| PREDICTED: protein furry [Amyelois transitella]                                                              | XM_021339033.1 | 1  |
| Borealin, partial [Pararge aegeria]                                                                          | XM_021339216.1 | 1  |
| PREDICTED: LOW QUALITY PROTEIN: papilin [Bombyx mori]                                                        | XM_021339229.1 | 3  |
| single domain major allergen 2 protein, partial [Helicoverpa armigera]                                       | XM_021339300.1 | 1  |
| PREDICTED: tigger transposable element-derived protein 1-like [Cyphomyrmex costatus]                         | XM_021339425.1 | 1  |
| PREDICTED: carbonyl reductase family member 4-like [Plutella xylostella]                                     | XM_021339635.1 | 1  |
| Splicing factor 3A subunit 1 [Papilio xuthus]                                                                | XM_021339891.1 | 1  |
| fructose 1,6-bisphosphate aldolase [Danaus plexippus]                                                        | XM_021339924.1 | 1  |
| AAEL002442-PA [Aedes aegypti]                                                                                | XM_021340037.1 | 1  |
| RE1-silencing transcription factor [Papilio machaon]                                                         | XM_021340084.1 | 1  |
| arylphorin [Helicoverpa armigera]                                                                            | XM_021340131.1 | 9  |
| arylphorin [Helicoverpa armigera]                                                                            | XM_021340132.1 | 9  |
| PREDICTED: CDK5RAP1-like protein [Amyelois transitella]                                                      | XM_021340164.1 | 1  |
| PREDICTED: protein cramped [Papilio machaon]                                                                 | XM_021340266.1 | 1  |
| PREDICTED: trypsin-7-like [Bombyx mori]                                                                      | XM_021340310.1 | 1  |
| PREDICTED: cytochrome b5 [Bombyx mori]                                                                       | XM_021340359.1 | 1  |
| PREDICTED: afadin [Bombyx mori]                                                                              | XM_021340557.1 | 1  |
| trypsin T2a [Heliothis virescens]                                                                            | XM_021340589.1 | 4  |
| trypsin [Heliothis virescens]                                                                                | XM_021340592.1 | 1  |
| trypsin-like protease [Helicoverpa armigera]                                                                 | XM_021340596.1 | 6  |
| trypsin-like protease [Helicoverpa armigera]                                                                 | XM_021340599.1 | 8  |
| serine protease [Helicoverpa armigera]                                                                       | XM_021340600.1 | 7  |
| trypsin T4 [Heliothis virescens]                                                                             | XM_021340602.1 | 3  |
| Cyclic nucleotide-gated channel rod photoreceptor subunit alpha [Papilio machaon]                            | XM_021340607.1 | 2  |
| proline synthetase co-transcribed bacterial-like protein [Bombyx mori]                                       | XM_021340969.1 | 1  |
| PREDICTED: titin [Bombyx mori]                                                                               | XM_021341017.1 | 3  |
| fatty acid-binding protein 2 [Helicoverpa armigera]                                                          | XM_021341051.1 | 5  |
| fatty acid-binding protein 1 [Helicoverpa armigera]                                                          | XM_021341061.1 | 2  |
| fatty acid-binding protein 2 [Helicoverpa armigera]                                                          | XM_021341064.1 | 1  |
| heat shock protein 90 [Helicoverpa armigera]                                                                 | XM_021341131.1 | 2  |
| PREDICTED: structure-specific endonuclease subunit SLX4 [Papilio xuthus]                                     | XM_021341178.1 | 1  |
| chitin deacetylase 5a [Helicoverpa armigera]                                                                 | XM_021341184.1 | 4  |
| PREDICTED: aquaporin AQPae.a [Papilio polytes]                                                               | XM_021341250.1 | 1  |

|                                                                                                  |                |    |
|--------------------------------------------------------------------------------------------------|----------------|----|
| PREDICTED: microtubule-actin cross-linking factor 1, isoforms 1/2/3/5 [Amyelois transitella]     | XM_021341213.1 | 1  |
| mitochondrial NADH dehydrogenase iron-sulfur protein 2 [Spodoptera litura]                       | XM_021341326.1 | 1  |
| Myrosinase 1 [Papilio xuthus]                                                                    | XM_021341387.1 | 1  |
| PREDICTED: golgin subfamily A member 4-like isoform X2 [Papilio xuthus]                          | XM_021341427.1 | 1  |
| PREDICTED: nesprin-1 isoform X2 [Amyelois transitella]                                           | XM_021341577.1 | 2  |
| -                                                                                                | XM_021341648.1 | 1  |
| apolipoprotein precursor protein [Bombyx mori]                                                   | XM_021341851.1 | 19 |
| PREDICTED: histone H2A.V [Plutella xylostella]                                                   | XM_021341894.1 | 2  |
| Repat39-like protein, partial [Heliothis virescens]                                              | XM_021341989.1 | 4  |
| Repat39-like protein, partial [Heliothis virescens]                                              | XM_021341986.1 | 1  |
| ATM interactor [Papilio machaon]                                                                 | XM_021342022.1 | 1  |
| PREDICTED: round spermatid basic protein 1-like protein [Bombyx mori]                            | XM_021342295.1 | 1  |
| PREDICTED: moesin/ezrin/radixin homolog 1 isoform X1 [Amyelois transitella]                      | XM_021342618.1 | 7  |
| PREDICTED: myb-like protein V isoform X1 [Plutella xylostella]                                   | XM_021342705.1 | 1  |
| PREDICTED: dynamin-like 120 kDa protein, mitochondrial isoform X1 [Amyelois transitella]         | XM_021343034.1 | 1  |
| PREDICTED: serine protease inhibitor 3 isoform X1 [Bombyx mori]                                  | XM_021343251.1 | 1  |
| cathepsin O1-like protease [Chilo suppressalis]                                                  | XM_021343409.1 | 1  |
| PREDICTED: myosin-IB isoform X1 [Papilio xuthus]                                                 | XM_021343418.1 | 2  |
| abnormal wing disc-like protein [Spodoptera litura]                                              | XM_021343497.1 | 3  |
| copper transporter [Bombyx mori]                                                                 | XM_021343597.1 | 1  |
| PREDICTED: phosphoinositide 3-kinase regulatory subunit 4 [Papilio polytes]                      | XM_021343607.1 | 1  |
| PREDICTED: dol-P-Man:Man(7)GlcNAc(2)-PP-Dol alpha-1,6-mannosyltransferase [Amyelois transitella] | XM_021343637.1 | 1  |
| PREDICTED: probable cation-transporting ATPase 13A3 isoform X2 [Amyelois transitella]            | XM_021343656.1 | 1  |
| PREDICTED: cytoplasmic aconitate hydratase-like [Papilio machaon]                                | XM_021343744.1 | 1  |
| eIF2 alpha subunit [Spodoptera frugiperda]                                                       | XM_021343871.1 | 2  |
| pancreatic lipase 2 [Mamestra configurata]                                                       | XM_021343929.1 | 4  |
| PREDICTED: protein transport protein Sec61 subunit alpha isoform 2 [Amyelois transitella]        | XM_021344022.1 | 1  |
| transferin [Helicoverpa armigera]                                                                | XM_021344034.1 | 2  |
| diverged serine protease [Helicoverpa armigera]                                                  | XM_021344422.1 | 5  |
| serine protease 52 [Mamestra configurata]                                                        | XM_021344467.1 | 2  |
| neutral lipase [Helicoverpa armigera]                                                            | XM_021344621.1 | 2  |
| PREDICTED: 39S ribosomal protein L51, mitochondrial [Amyelois transitella]                       | XM_021344681.1 | 1  |
| inactive lipase, partial [Helicoverpa armigera]                                                  | XM_021344707.1 | 1  |
| trypsin 2 [Helicoverpa armigera]                                                                 | XM_021344969.1 | 1  |
| peroxiredoxin-4 precursor [Bombyx mori]                                                          | XM_021344991.1 | 2  |
| PREDICTED: parafibromin [Bombyx mori]                                                            | XM_021345005.1 | 1  |
| PREDICTED: protocadherin-23-like [Plutella xylostella]                                           | XM_021345210.1 | 3  |
| beta-1,3-glucanase [Helicoverpa armigera]                                                        | XM_021345260.1 | 2  |
| PREDICTED: tropomyosin-2 isoform X3 [Papilio xuthus]                                             | XM_021345380.1 | 2  |
| PREDICTED: protein kish-A [Amyelois transitella]                                                 | XM_021345425.1 | 1  |
| chymotrypsin [Helicoverpa armigera]                                                              | XM_021345778.1 | 5  |
| chymotrypsin-like protease [Helicoverpa armigera]                                                | XM_021345779.1 | 7  |
| serine protease 3, partial [Helicoverpa zea]                                                     | XM_021345780.1 | 8  |
| chymotrypsinogen [Helicoverpa punctigera]                                                        | XM_021345781.1 | 7  |
| chymotrypsin-like protease C8 [Heliothis virescens]                                              | XM_021345791.1 | 1  |
| chymotrypsin-like protease [Helicoverpa armigera]                                                | XM_021345818.1 | 2  |
| chymotrypsin-like protease [Helicoverpa armigera]                                                | XM_021345819.1 | 1  |
| PREDICTED: phosphatidylinositol 4-phosphate 5-kinase type-1 gamma isoform X1 [Bombyx mori]       | XM_021345965.1 | 1  |
| Histone H4 [Larimichthys crocea]                                                                 | XM_021346040.1 | 4  |

**Table S3.** Primers used for qRT-PCR.

| <b>Primer name</b> | <b>Sequence (5' to 3')</b> |
|--------------------|----------------------------|
| Trypsin T4-F       | TATTGCGGCTCTTCTCTA         |
| Trypsin T4-R       | CGGTTGTTGATGATGGTA         |
| Trypsin -F         | CATCGTCCGTGAGAACAA         |
| Trypsin -R         | ACAACCTCGTTATCATCCAA       |
| esterase E4-F      | GCCTTCATACACCTTAGA         |
| esterase E4-R      | TTACCAGATTCAGAGACAA        |
| ABCG23-F           | ATTGTATTGGTCTAATGAG        |
| ABCG23-R           | CATCTTCTAAGGATATGC         |
| ABCC1-F            | TTAAGTTGGTTAGTTCAATCAG     |
| ABCC1-R            | CCGCATACTCCTTCATAC         |
| Polycalin-F        | GAGTCATAAGCACAGATAA        |
| Polycalin-R        | GATATAATCCGTTGAGAGTA       |
| APN-F              | CTGGATATGTTGAAGAGAA        |
| APN-R              | GTAGTAGTCGTAGTCGTA         |
| ALP2-F             | ATACTCATCACCACTCAA         |
| ALP2-R             | GAATAGCCACCTCTGTCA         |
| $\beta$ -Actin-F   | CCTGGTATTGCTGACCGTATGC     |
| $\beta$ -Actin-R   | CTGTTGGAAGGTGGAGAGGGAA     |
